# Supplementary material for: Cardiomyocyte gene programs encoding morphological and functional signatures in cardiac hypertrophy and failure
Source: PubMed Central journal article supplement (PMC6207673; doi:10.1038/s41467-018-06639-7), 2018-10-30
Supplement: 41467_2018_6639_MOESM3_ESM.pdf [file 41467_2018_6639_MOESM3_ESM.pdf]

## Description of Additional Supplementary Files

**File Name:** Supplementary Data 1

**Description:** Sequencing quality data of mouse cardiomyocytes.

**File Name:** Supplementary Data 2

**Description:** Sequencing quality data of human cardiomyocytes.

**File Name:** Supplementary Data 3

**Description:** Myh7 and Atp2a2 mRNA smFISH intensity at week 8.

**File Name:** Supplementary Data 4

**Description:** Module annotation in mouse cardiomyocytes.

**File Name:** Supplementary Data 5

**Description:** Atp2a2 mRNA smFISH dynamics.

**File Name:** Supplementary Data 6

**Description:** Integrative analysis of single-cell morphology and gene expression of TAC W1 cardiomyocytes.

**File Name:** Supplementary Data 7

**Description:** Cdkn1a mRNA smFISH dynamics.

**File Name:** Supplementary Data 8

**Description:** Raw data of Figure 5b, Figure 6f, and Supplementary Figure 14c.

**File Name:** Supplementary Data 9

**Description:** Raw data of Supplementary Figure 15b.

**File Name:** Supplementary Data 10

**Description:** Module annotation in human cardiomyocytes.

**File Name:** Supplementary Data 11

**Description:** Primer sequences.
